# Supplementary material
Source: Springer Nature journal article supplement (https://www.springermedizin.de/resource/supplementary/12985_2010_1045_MOESM1_ESM.pdf/9609020)

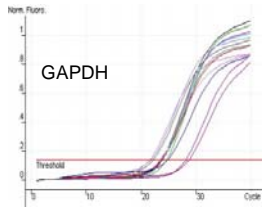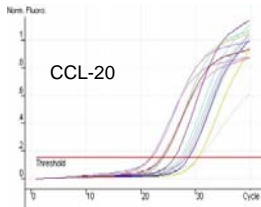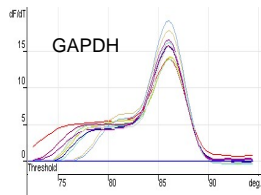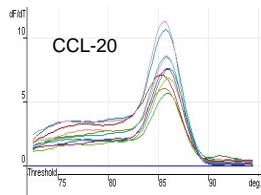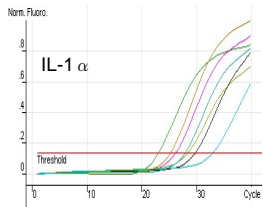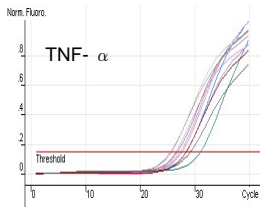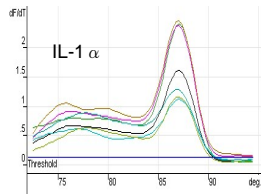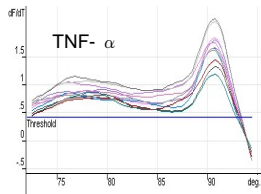

amplification curves

melting curves

Supplement: MOESM1 [file 9609020]
